# Supplementary material for: Structure determination of organic compounds by a fit to the pair distribution function from scratch without prior indexing
Source: PubMed Central journal article supplement (PMC8202035; doi:10.1107/s1600576721002569), 2021-05-09
Supplement: j-54-00776-sup1.pdf [file j-54-00776-sup1.pdf]

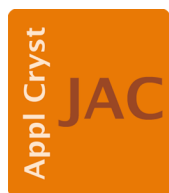

JOURNAL OF  
APPLIED  
CRYSTALLOGRAPHY

**Volume 54 (2021)**

**Supporting information for article:**

**Structure determination of organic compounds by a fit to the pair distribution function from scratch without prior indexing**

**Carina Schlesinger, Stefan Habermehl and Dragica Prill**

# Structure determination of organic compounds by a fit to the pair distribution function from scratch without prior indexing

Carina Schlesinger, Stefan Habermehl and Dragica Prill\*

Institute of Inorganic and Analytical Chemistry, Goethe University, Max-von-Laue-Str. 7, 60437 Frankfurt am Main, Germany

See: [doi.org/10.1107/S1600576721002569](https://doi.org/10.1107/S1600576721002569)

**Table S1** The ten best structural models for each space group  $P 2_1/c$  and  $P \bar{1}$  according to the similarity measure from the comparison step (Step 2) of the simulated PDF curve to the experimental one. For comparability the unit cells are transformed to a standard setting.

| Structure nr. | Space group | $S_{12}^{PDF}$ | $V / \text{\AA}^3$ | $a / \text{\AA}$ | $b / \text{\AA}$ | $c / \text{\AA}$ | $\alpha / ^\circ$ | $\beta / ^\circ$ | $\gamma / ^\circ$ |
|---------------|-------------|----------------|--------------------|------------------|------------------|------------------|-------------------|------------------|-------------------|
| 74505         | $P 2_1/c$   | 0.98867        | 484.72             | 6.3715           | 4.7606           | 16.4054          | 90                | 103.07321        | 90                |
| 63658         | $P 2_1/c$   | 0.98857        | 498.91             | 3.8486           | 10.4250          | 12.7314          | 90                | 102.38472        | 90                |
| 14990         | $P 2_1/c$   | 0.98807        | 479.13             | 5.9166           | 6.0078           | 13.4878          | 90                | 92.05359         | 90                |
| 53484         | $P 2_1/c$   | 0.98798        | 478.48             | 4.5207           | 8.2022           | 12.9041          | 90                | 90.15382         | 90                |
| 14456         | $P 2_1/c$   | 0.98795        | 494.18             | 3.9002           | 9.3667           | 13.7576          | 90                | 100.49867        | 90                |
| 10572         | $P 2_1/c$   | 0.98793        | 517.45             | 4.1244           | 12.1610          | 10.3244          | 90                | 92.21839         | 90                |
| 12906         | $P 2_1/c$   | 0.98787        | 478.33             | 3.6950           | 12.1050          | 11.2863          | 90                | 108.63799        | 90                |
| 10581         | $P 2_1/c$   | 0.98787        | 468.85             | 7.3272           | 10.1090          | 6.8278           | 90                | 112.01819        | 90                |
| 54325         | $P 2_1/c$   | 0.98786        | 525.56             | 6.7867           | 8.9131           | 8.7621           | 90                | 97.43980         | 90                |
| 63390         | $P 2_1/c$   | 0.98783        | 459.30             | 5.5010           | 12.8035          | 7.1401           | 90                | 114.03241        | 90                |
| 75386         | $P \bar{1}$ | 0.98903        | 232.40             | 3.6098           | 5.8026           | 11.2284          | 81.24075          | 88.84267         | 89.62096          |
| 31070         | $P \bar{1}$ | 0.98899        | 244.61             | 3.5951           | 6.0348           | 11.2966          | 87.78534          | 87.72826         | 88.21101          |
| 6626          | $P \bar{1}$ | 0.98880        | 235.91             | 4.0848           | 7.6831           | 8.2623           | 103.94298         | 105.71734        | 98.46187          |
| 68397         | $P \bar{1}$ | 0.98872        | 228.58             | 3.3679           | 5.7372           | 11.9513          | 82.87853          | 87.40186         | 86.61885          |
| 65993         | $P \bar{1}$ | 0.98857        | 229.24             | 3.4630           | 6.4152           | 10.8234          | 74.76291          | 85.91711         | 81.36423          |
| 41141         | $P \bar{1}$ | 0.98818        | 238.88             | 4.9278           | 7.1466           | 7.9689           | 104.28341         | 104.65984        | 109.30319         |
| 42426         | $P \bar{1}$ | 0.98812        | 265.31             | 4.2914           | 6.6802           | 9.6299           | 103.28189         | 95.30469         | 95.92610          |
| 50984         | $P \bar{1}$ | 0.98800        | 229.53             | 3.6442           | 5.8865           | 11.5313          | 103.30882         | 90.58841         | 106.90421         |
| 52508         | $P \bar{1}$ | 0.98785        | 258.03             | 3.7690           | 6.2932           | 11.1647          | 91.80456          | 96.17634         | 101.04892         |
| 32793         | $P \bar{1}$ | 0.98784        | 227.46             | 3.7578           | 6.4335           | 9.5797           | 86.61523          | 83.90621         | 81.37273          |
